# Supplementary material for: Adjuvant trastuzumab duration trials in HER2 positive breast cancer – what results would be practice-changing? Persephone investigator questionnaire prior to primary endpoint results
Source: Springer Nature journal article supplement (doi:10.1186/s12885-018-4307-8), 2018-04-05
Supplement: MOESM1 [file 15593792]

## Trastuzumab duration questionnaire

Name: \_\_\_\_\_

Hospital: \_\_\_\_\_

This questionnaire is designed to survey clinician's opinions on trastuzumab treatment in the HER2 positive early breast cancer setting, and more specifically the comparison between 12 months and 6 months duration of trastuzumab treatment. Its aim is to capture what clinicians consider both the effectiveness and toxicity profile of the two treatment durations.

### **Disease-Free Survival at 4 years**

The PERSEPHONE trial assumed that patients receiving 12 months of trastuzumab would have a 4-year DFS of 85%. If this is proved accurate,

(a) ... what 4-year DFS rate would you expect patients receiving 6 months trastuzumab to have?

*(Please tick one box in column (a) to answer this part of the question)*

(b) ... what is the lowest 4-year DFS rate for 6 months trastuzumab patients that you would be comfortable with in order to change your practice to prescribing 6 months instead of the current standard of 12 months trastuzumab?

*(Please tick one box in column (b) to answer this part of the question)*

| 4-year DFS rate for 6 months trastuzumab patients | (a) | (b) |
|---------------------------------------------------|-----|-----|
| 85%                                               |     |     |
| 84%                                               |     |     |
| 83%                                               |     |     |
| 82%                                               |     |     |
| 81%                                               |     |     |
| 80%                                               |     |     |
| 79%                                               |     |     |
| 78%                                               |     |     |
| 77%                                               |     |     |
| 76%                                               |     |     |
| 75%                                               |     |     |
| Other                                             |     |     |

If 'Other' ticked above, please specify (a) \_\_\_\_\_

(b) \_\_\_\_\_

## **Disease-Free Survival in different subsets of patients**

At the present time, in your opinion, in terms of disease-free-survival, is 6 months trastuzumab an inferior treatment, an equivalent treatment or a superior treatment when compared to 12 months trastuzumab in the following subsets of patients?

*(Please tick one box in each row)*

|                                                               | <u>Inferior</u>          | <u>Equivalent</u>        | <u>Superior</u>          |
|---------------------------------------------------------------|--------------------------|--------------------------|--------------------------|
| ER Positive patients                                          | <input type="checkbox"/> | <input type="checkbox"/> | <input type="checkbox"/> |
| ER Negative patients                                          | <input type="checkbox"/> | <input type="checkbox"/> | <input type="checkbox"/> |
| Patients receiving anthracycline-based CT (no taxane)         | <input type="checkbox"/> | <input type="checkbox"/> | <input type="checkbox"/> |
| Patients receiving taxane-based CT (no anthracyclines)        | <input type="checkbox"/> | <input type="checkbox"/> | <input type="checkbox"/> |
| Patients receiving taxane + anthracycline CT                  | <input type="checkbox"/> | <input type="checkbox"/> | <input type="checkbox"/> |
| Patients receiving CT with no taxane or anthracycline         | <input type="checkbox"/> | <input type="checkbox"/> | <input type="checkbox"/> |
| Patients receiving concurrent trastuzumab and CT              | <input type="checkbox"/> | <input type="checkbox"/> | <input type="checkbox"/> |
| Patients receiving sequential trastuzumab (i.e. after all CT) | <input type="checkbox"/> | <input type="checkbox"/> | <input type="checkbox"/> |

Are there alternative/additional subsets of patients for whom you consider 6 months trastuzumab treatment to be either an inferior treatment, an equivalent treatment or a superior treatment, in terms of disease-free-survival, when compared to 12 months trastuzumab?

If so, please specify below.

*(Please tick one box in each row)*

|       | <u>Inferior</u>          | <u>Equivalent</u>        | <u>Superior</u>          |
|-------|--------------------------|--------------------------|--------------------------|
| _____ | <input type="checkbox"/> | <input type="checkbox"/> | <input type="checkbox"/> |
| _____ | <input type="checkbox"/> | <input type="checkbox"/> | <input type="checkbox"/> |
| _____ | <input type="checkbox"/> | <input type="checkbox"/> | <input type="checkbox"/> |
| _____ | <input type="checkbox"/> | <input type="checkbox"/> | <input type="checkbox"/> |

## **Cardiotoxicity**

| In your opinion, what % of patients would, during their trastuzumab treatment, ...      | 12 months trastuzumab | 6 months trastuzumab |
|-----------------------------------------------------------------------------------------|-----------------------|----------------------|
| ... suffer clinically relevant congestive heart failure <sup>†</sup> (CHF)?             | _____%                | _____%               |
| ... report an LVEF <50% <u>or</u> an ECHO/MUGA classed as 'abnormal' by a cardiologist? | _____%                | _____%               |

<sup>†</sup> Clinically relevant CHF = symptoms of cardiac disease, or signs of congestive heart failure or receive medication for cardiac disease

## Trade-off of Disease-Free Survival and Cardiotoxicity

We're now going to consider what decrease in DFS might be deemed as acceptable to avoid various **hypothetical increased levels** of cardiotoxicity (defined as LVEF <50% or an ECHO/MUGA classed as 'abnormal' by a cardiologist).

Assuming 12 month trastuzumab gives a 4-year DFS of 85%, how low a 4-year DFS would you accept as a trade-off to avoid the following **hypothetical absolute increases** in cardiotoxicity rates?

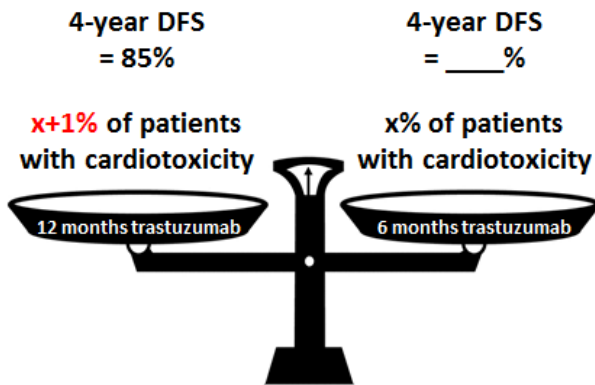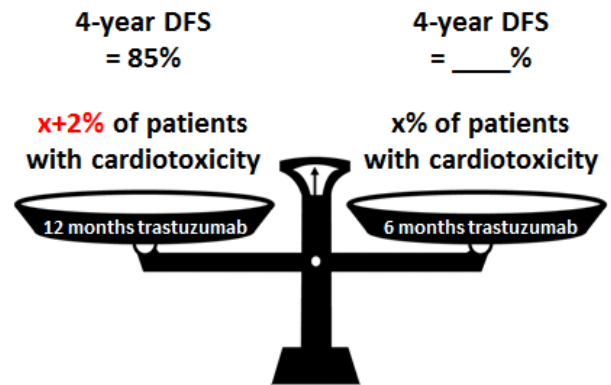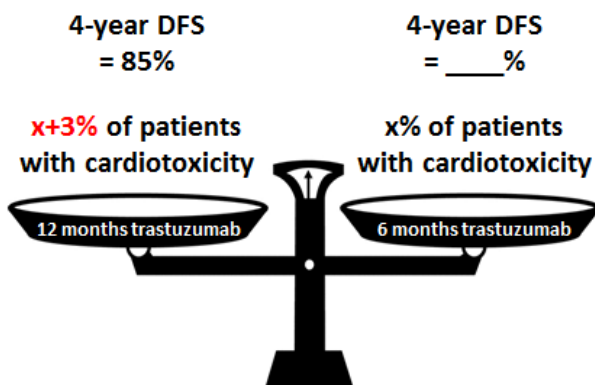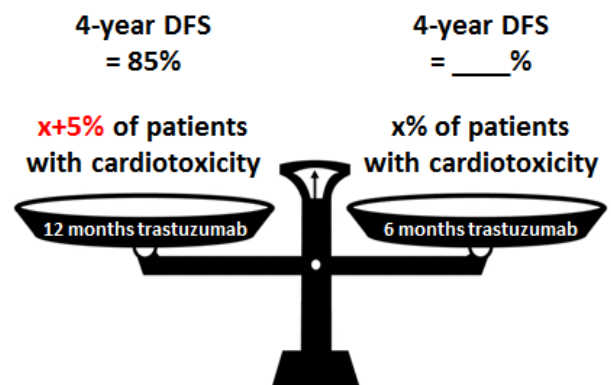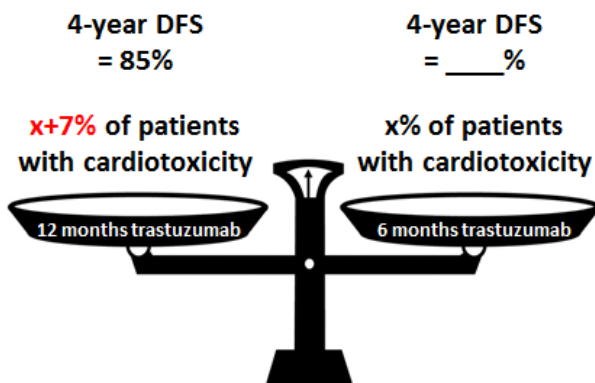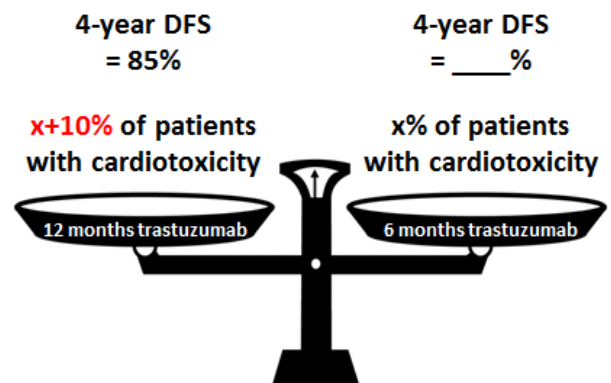

**Please use the section below should you wish to add any comments**

---

---

---

---

---

---

---

---

---

---

---

---

---

---

---

---

---

---

---

---

---

---

---

**Thank you very much for taking time to consider the questions and complete this questionnaire.**

Please return this questionnaire to Shrushma Loi, PERSEPHONE Trial Co-ordinator.

***Via post:*** PERSEPHONE Trial  
Warwick Clinical Trials Unit  
Warwick Medical School  
University of Warwick  
Gibbet Hill  
Coventry  
CV4 7AL

**OR**

***Via e-mail:*** [Persephone@warwick.ac.uk](mailto:Persephone@warwick.ac.uk)

***OR***

***Via fax:*** + 44 (0) 2476 151 586
